# Supplementary material for: Cre Fused with RVG Peptide Mediates Targeted Genome Editing in Mouse Brain Cells In Vivo
Source: PubMed Central journal article supplement (PMC5187904; doi:10.3390/ijms17122104), 2016-12-14
Supplement: ijms-17-02104-s001.pdf [file ijms-17-02104-s001.pdf]

# Supplementary Materials: Cre Fused with RVG Peptides Mediates Targeted Genome Editing in Mouse Brain Cells In Vivo

Zhiyuan Zou, Zhaolin Sun, Pan Li, Tao Feng and Sen Wu

**Table S1.** List of oligos for pET-RVG-Cre and pET-wtCre construction.

| Oligo ID  | Oligo Sequence                                                                                                          |
|-----------|-------------------------------------------------------------------------------------------------------------------------|
| RVG-Cre-F | 5'-GAGATATAccatgggcTACACCATCTGGATGCCGAAAACCCGCGTCCGGGTACCCCGTCCGACATCTTCACCAACTCTCGTGGTAAACGTGCTTCTAACGGTGGTGGTggcca-3' |
| RVG-Cre-R | 5'-ggcTACACCATCTGGATGCCGAAAACCCGCGTCCGGGTACCCCGTCCGACATCTTCACCAACTCTCGTGGTAAACGTGCTTCTAACGGTGGTGGTggccata-3'            |
| Cre-F     | 5'-catggcggcca-3'                                                                                                       |
| Cre-R     | 5'-tatggccc-3'                                                                                                          |

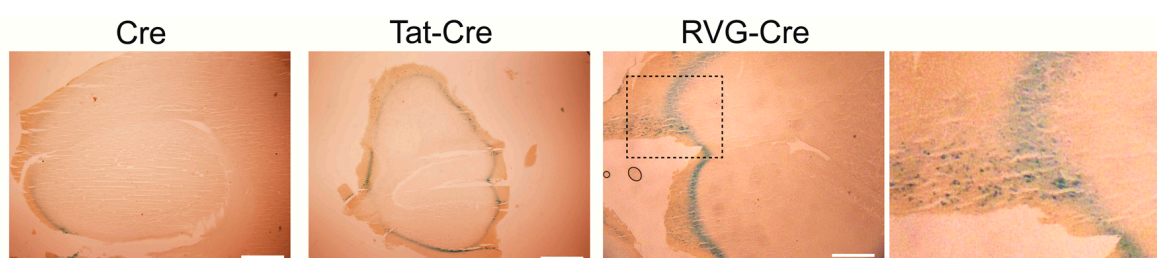

**Figure S1.** Sections of whole-mount brain staining from *Rosa26<sup>lacZ</sup>* mice injected with RVG-Cre, TAT-Cre and Cre proteins, respectively ( $n = 3$ ). RVG-Cre mainly targeted to the cerebral cortex. Scale bar is 200  $\mu$ M.

## Full sequences of RVG-Cre Cassette:

5'-atgggcTACACCATCTGGATGCCGAAAACCCGCGTCCGGGTACCCCGTCCGACATCTTCACCAACTCTCGTGGTAAACGTGCTTCTAACGGTGGTGGTggccatatggctagcatgactggtggacagcaaatgggtcgggatccgaattcactgtccaatttactgaccgtacacaaaattgctgcattaccggtcgatgcaacgagtgatgaggttcgcagaacctgatggacatgttcaggatcgccaggcggtttctgagcatactggaaaatgcttctgcccgttcggtggcgatggtgcaagtgaataaccggaaatggttcccgcagaacctgaagatgttcgagattatcttctatatcttcaggcgcggtctggcagtaaaaactatccagcaacatttggccagctaacatgcttcatctgcggtccgggtgccacgaccaagtacagcaatgctgtttcactggttatgcgccgatccgaaaagaaaacgttgatgcccgtgaacgtgcaaacaggctctagcgttcgaacgactgatttcgaccaggttcgttactcatggaaaatagcagctgcccaggatatactggaattctgggattgcttataacacctgttacgtatagccgaaatgccaggatcagggtaagatactcactgactgacggtgggagaatgtaatacattggcagaacgaaaacgtggttagcaccgaggtgtagagaaggcacttagcctgggtaactaaactggtcagcgatggtttccgtctctggtgtagctgatgacccaataactacctggtttccgggtcagaaaaatggtgtgccgcgcatctgccaccagccagctatcaactcgccctggaaggatgtttgaagcaactatcattgatttacggcgtaaggatgactctggtcagagatacctggcctggtcggacacagtgcccgtgctggagccgcgagatggcccgcgtggagtccaataaccggagatcatgcaagctggtggtggaaccaatgtaataattgtcatgaaataatccgtaacctggatagtgaaacaggggcaatggtgcgctgctggaagatggcgatgggcccactcagcaccaccaccactga-3'

## Full Sequences of TAT-Cre Cassette:

5'-atgggcaggaagaagcggagacagcgacgaagaggccatagtgctagcatgactggtggacagcaaatgggtcgggatccgaattcactgtccaatttactgaccgtacacaaaattgctgcattaccggtcgatgcaacgagtgatgaggttcgaagaacctgatggacatgttcaggatcgccaggcggtttctgagcatactggaaaatgcttctgcccgttcggtggcgatggtgcaagtgaataaccggaaatggttcccgcagaacctgaagatgttcgagattatcttctatatcttcaggcgcggtctggcagtaaaaactatccagcaacatttggccagctaacatgcttcatctgcggtccgggtgccacgaccaagtacagcaatgctgtttcactggttatgcccggatccgaaaagaaaacgttgatgcccgtgaacgtgcaaacaggctctagcgttcgaacgactgatttcgaccaggttcgttactcatggaaaatagcagctgcccaggatatactggaattctggcattctgggattgcttataacacctgttacgtatagccgaaatgccaggatcagggtaagatactcactgactgacggtgggagatgtaatacattggcagaacgaaaacgtggttagcaccgaggtgtagagaaggcacttagcctggggtaactaaactggtcagcgat

ggatttccgtctctggtgtagctgatgatccgaataactacctgtttgccgggtcagaaaaatggtgttgccgcgcatctgccaccagccagct  
atcaactcgcgacctggaagggttttgaagcaactcatcgattgatttacggcgctaaggatgactctggtcagagatactggcctggtctgg  
acacagtcccgtgtcggagccgcgcgagatatggcccgcctggagttcaataccggagatcatgcaagctggtggctggaccaatgtaaat  
attgcatgaactatatccgtaacctggatagtgaaacaggggcaatggtgcgctgctggaagatggcgtatcgggccgactcagaccacc  
accaccaccactga-3'

**Full Sequences of Cre Cassette:**

5'-atgggcggccatatggctagcatgactggtggacagcaaatgggtcgggatccgaattccatgtccaattactgaccgtacacaaaattg  
cctgcattaccggtcgtatgcaacgagtgatgaggttcgaagaacctgatggacatgttcaggatcgcagggcgttttctgacatactggaa  
aatgcttctgtccgtttgccggtcgtgggcccagtggtgcaagtgaataaccggaaatggttcccgcagaacctgaagatgttcgcgattatctt  
ctatatctcaggcgcgctgctggcagtaaaaactatccagcaacattgggcccagctaaacatgcttcatcgtcgggtccgggctgccagacca  
agtgacagcaatgctgttactggttatgcggcgatccgaaaagaaaacgttcatgcccgtgaacgtgcaaacaggctctagcgttcgaac  
gcactgatttcgaccaggttcgttactcatgaaaatagcgatcgtcgcagatatacgtaatctggcatttctggggattgcttataacacctg  
ttactatagccgaaatgccaggatcaggggttaaagatatctcagctactgacggtgggagaatgtaatccatattggcagaacgaaaacgct  
ggtagcaccgaggtgtagagaaggcacttagcctgggggtaactaaactggtcagcgatggattccgtctctggtgtagctgatgatccg  
aataactacctgtttgccgggtcagaaaaatggtgttgccgcgcatctgccaccagccagctatcaactcgcgacctggaagggttttga  
gcaactcatcgattgatttacggcgctaaggatgactctggtcagagatactggcctggtctggacacagtcccgtgtcggagccgcgcgag  
atatggcccgcgtggagttcaataccggagatcatgcaagctggtggctggaccaatgtaaatattgcatgaactatatccgtaacctggata  
gtgaaacaggggcaatggtgcgctgctggaagatggcgtatcgggccgactcagaccaccaccaccactga-3'
